# Supplementary material for: Uncertainties of ground-based microwave radiometer retrievals in zenith and off-zenith methods under snow conditions
Source: Copernicus journal article supplement (doi:10.5194/amt-2016-253), 2016-08-15
Supplement: Supplementary file [file amt-2016-253-AC3-supplement.pdf]

Thanks for all the referees to provide very useful comments and suggestions. We have improved the manuscript according to the suggestions and also point the page and line number where the modification positing in the revised manuscript. Please see our responses below.

Changes in the manuscript by us:

1. In the process of manuscript revising, Dejun Li provides us with disdrometer data and also helps us to discussing the measurements of disdrometer, so we add him as a co-author.
2. The time in Fig. 7,9,11 is mistaken, we correct it.

Below is response for comments:

### **Referee #1**

Responses are shown in reply to comment1.

### **Referee #2**

Responses are shown in reply to comment2.
